# Supplementary material for: Overexpression of TMEM47 Induces Tamoxifen Resistance in Human Breast Cancer Cells
Source: PubMed Central journal article supplement — Technol Cancer Res Treat. 2021 Mar 22;20:15330338211004916. doi: 10.1177/15330338211004916 (PMC7989118; doi:10.1177/15330338211004916), 2021-03-22
Supplement: sj-pdf-1-tct-10.1177_15330338211004916.pdf [file sj-pdf-1-tct-10.1177_15330338211004916.pdf]

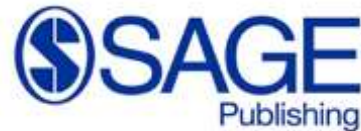

# SAGE AUTHORSHIP CHANGE REQUEST

---

## INSTRUCTIONS:

Please print and complete all sections of this form. We require that all authors (including current co-authors, those to be added and those to be removed) sign the relevant sections below. Once complete, please email the form back to sender.

---

### SECTION ONE: PAPER INFORMATION

|              |  |                      |
|--------------|--|----------------------|
| JOURNAL NAME |  |                      |
| PAPER TITLE  |  | MANUSCRIPT ID NUMBER |
|              |  |                      |

---

### SECTION TWO: ESSENTIAL CONDITIONS FOR CHANGE

The new author list should contain only those who can legitimately claim authorship. This is all those who:

- 1) Have made a substantial contribution to the concept and design, acquisition of data or analysis and interpretation of data; AND
- 2) Drafted the article or revised it critically for important intellectual content; AND
- 3) Approved the version to be published.

NB: Registered authors should meet the conditions of all of the points above. All contributors who do not meet the criteria for authorship should instead be listed in an 'Acknowledgements' section.

---

### SECTION THREE: REASON FOR AUTHORSHIP CHANGE

Please provide a detailed explanation for the change in authors in the box below.

---

**SECTION FOUR: AUTHOR DECLARATIONS**

We agree to the proposed change of authorship to the above paper. NB: all authors (added and removed) must sign below

**DECLARATION: All the below listed authors agree that they can claim authorship to the submitted paper as they meet the criteria of the points listed in SECTION TWO.**

| List of existing and proposed new authors to sign. Please sign, indicating your agreement to the proposed change. The individuals listed below will each be credited as authors in the published paper. (Please add additional rows if required.) |                  |      |
|---------------------------------------------------------------------------------------------------------------------------------------------------------------------------------------------------------------------------------------------------|------------------|------|
| Author name                                                                                                                                                                                                                                       | Author signature | Date |
|                                                                                                                                                                                                                                                   |                  |      |
|                                                                                                                                                                                                                                                   |                  |      |
|                                                                                                                                                                                                                                                   |                  |      |
|                                                                                                                                                                                                                                                   |                  |      |
|                                                                                                                                                                                                                                                   |                  |      |

**DECLARATION: All the below listed authors agree that they cannot claim authorship to the submitted paper as they do not (or no longer) meet the criteria of the points listed in SECTION TWO.**

| List of removed authors. Please sign, indicating your agreement to be removed from the list of registered authors. The individuals listed below will not be credited as authors in the published paper. (Please add additional rows if required.) |                  |      |
|---------------------------------------------------------------------------------------------------------------------------------------------------------------------------------------------------------------------------------------------------|------------------|------|
| Author name                                                                                                                                                                                                                                       | Author signature | Date |
|                                                                                                                                                                                                                                                   |                  |      |
|                                                                                                                                                                                                                                                   |                  |      |
|                                                                                                                                                                                                                                                   |                  |      |
